# Supplementary material
Source: PubMed Central journal article supplement (PMC1356544)
Supplement: plntcell_tpc.105.037044_1.pdf [file plntcell_tpc.105.037044_1.pdf]

Supplemental Table 1. PCR-based molecular markers developed for this study

| <b>Marker Name</b>    | <b>Enzyme</b>      | <b>Fragment Sizes (bp)</b> |               | <b>Primer sequence</b>                                                       |
|-----------------------|--------------------|----------------------------|---------------|------------------------------------------------------------------------------|
| <b>For mapping</b>    |                    |                            |               |                                                                              |
|                       |                    | <b>Ler</b>                 | <b>Col</b>    |                                                                              |
| <i>MQP15(CAPS)</i>    | Hind III           | 1128                       | 871, 257      | Forward: ATCTCCAATCTCAAATCTCC<br>Reverse: ATGTAGCACTAAGAAACCAGCC             |
| <i>MXE2(CAPS)</i>     | Hinf I             | 551, 322, 63               | 614, 322      | Forward: CGATAGCATAGATGTTTCAAGC<br>Reverse: AAGGAAATACAACGCTTAGTCG           |
| <i>MMG15(CAPS)</i>    | Sac I              | 705,613,134                | 839, 613      | Forward: CGGCAGTGGTGTGATTTACAG<br>Reverse: TACAACAAAACACAAAGCCC              |
| <i>MOJ10a(CAPS)</i>   | BstU I             | 1488                       | 1244, 244     | Forward: AGTAAGCCAGCGAAAAAGAAGG<br>Reverse: CACGACCGTTGTTCTTGAATGG           |
| <i>MOJ10i(CAPS)</i>   | EcoR I             | 611, 565, 111              | 676, 611      | Forward: CTGTGAAATCAGCCCCTCAT<br>Reverse: CGTTTCGATTGGATGGAATT               |
| <i>MOJ10s(SSLP)</i>   |                    | 99                         | 113           | Forward: GGTTTAGCTTTAGACTCGGTTT<br>Reverse: AGGTCTAAGTTTTGAAATTTTATCAT       |
| <b>For genotyping</b> |                    |                            |               |                                                                              |
|                       |                    | <b>Ler</b>                 | <b>Mutant</b> |                                                                              |
| <i>tso1-1(dCAPS)</i>  | AlwN I             | 130                        | 150           | Forward: GCAAGAAATCAAAGTGTATGAACAGATACT<br>Reverse: GACTCCACCCTACAAGATCA     |
| <i>tso1-3(dCAPS)</i>  | BsmF I             | 80                         | 100           | Forward: TGTTTTGGCTACCCGCAAACAGATTGAGTCC<br>Reverse: GAGAGCTCTTACACTAGCTTCCA |
| <i>tso2-1(dCAPS)</i>  | Mbo II             | 62                         | 90            | Forward: AAGAAGTAGATCTATCAGAA<br>Reverse: AGAAAGCGAGGACGTGTTTG               |
| <i>tso2-2(CAPS)</i>   | Kpn I              | 599, 521                   | 1120          | Forward: AGCATCAAACAAACGCTCT<br>Reverse: AATCCCTTCAAAGATGCCTTC               |
| <i>tso2-3(CAPS)</i>   | Hha I <sup>a</sup> | 532, 300, 145              | 852, 145      | Same as above<br>Reverse: AACCTTAGAGAAGCATC                                  |
| <i>mr2a-1(CAPS)</i>   | PflM I             | 785, 154                   | 939           | Forward: TTTGCTGTGAGGCTGGTCGCTTTT<br>Reverse: CTTCCAGATTCGATGGCGGATTCA       |
| <i>mr2b-1(CAPS)</i>   | Hae III            | 600, 600                   | 1200          | Forward: CGATTAAATCTTCTTACCGGA<br>Reverse: GGCTCCAATCCTTTTTGGAT              |

a. Hha I produces three additional fragments (71,63,10) in both *Ler* and *tso2-3*.
