# Supplementary material
Source: PubMed Central journal article supplement (PMC1356544)
Supplement: plntcell_tpc.105.037044_2.pdf [file plntcell_tpc.105.037044_2.pdf]

Supplemental Table 2. Primer sequences used in semiquantitative RT-PCR

| Gene    | Forward primer sequence       | Reverse primer sequence      |
|---------|-------------------------------|------------------------------|
| TSO2    | 5'CATCTCTTTCGTGCCATTGA3'      | 5'TCGCAGACGATTGATTTCAC3'     |
| RNR2A   | 5'ACTGATGTGCAACAGTGGGA3'      | 5'TCCTTCTCCTTCGAGTCCTTT3'    |
| RNR2B   | 5'CGTTTGAAAGCGATTGTTTG3'      | 5'TGATCATCATTAACGCAGC3'      |
| Actin2  | 5'GTTGGGATGAACCAGAAGGA3'      | 5'CTTACAATTTCCCGCTCTTC3'     |
| SAG12   | 5' CCAAATAAAATGTCGCCGT3'      | 5'TTGACTCAGTTGTCAAGCCG3'     |
| SAG13   | 5' CTCTCGTGACCAACGAGTGA3'     | 5'TCATTTGCTTCTCCAACACG3'     |
| PR1     | 5'GAGCTTAGCCTCACCACCAA3'      | 5'TGTACCGGAATCTGACACCA3'     |
| PR5     | 5'TCGTCTTCATCACAAGTGGC3'      | 5'TCGGATCCATGATCCTAAGC3'     |
| GST6    | 5'TCAAGCTCGTCTTCCCTTGT3'      | 5'GGTTGCCTTGACTTTCTTGC3'     |
| GST22   | 5'CAATGGCGGAGAAAGAAGAG3'      | 5'CTGCGACCAAGTCCAAAAAT3'     |
| EDS1    | 5'GGAGCAGTCGTAATCTTCGC3'      | 5'CAAATGTACACACACGAGG3'      |
| PRXcb   | 5'AGTTAAGGTCGGACCCTCGT3'      | 5'CTCTCCTTCCCAAAGGAACC3'     |
| AtRAD51 | 5'GGCCATGTACATTGATGCTG3'      | 5'CCAGCAAAAAGAGCTGAACC3'     |
| AtPARP1 | 5'CAAATTCAGAGCAGGCACA3'       | 5'CATGGCATCGGTAAAGTCCT3'     |
| AtPARP2 | 5'AACGAGGCTTGAGGAAGTGA3'      | 5'CGTATATCCCGAATGCGTCT3'     |
| TSI     | 5'GAACTCATGGATAACCCTAAAATAC3' | 5'CTCTACCCTTTGCATTCATGAATC3' |
| CAB1    | 5'TGATTTTCGGTTTCGATCCTC3'     | 5'ATCGAACCAACCTCCAG3'        |
| CAB2    | 5'AGTTATCCACAGCAGGTGGG3'      | 5'CGTTCTTGAGCTCCTTCACC3'     |
| RbcS    | 5'CCACTATGGTCGCTCCTTTC3'      | 5'TTGTCAGTACCGTCCATCA3'      |
